# Supplementary material for: Data gaps and opportunities for comparative and conservation biology
Source: PubMed Central journal article supplement — Proc Natl Acad Sci U S A. 2019 Apr 19;116(19):9658–64. doi: 10.1073/pnas.1816367116 (PMC6511006; doi:10.1073/pnas.1816367116), 2019-04-19
Supplement: pnas.1816367116.sapp.pdf [file pnas.1816367116.sapp.pdf]

## Data gaps and opportunities for comparative and conservation biology

### Authors:

Dalia A. Conde, Johanna Staerk, Fernando Colchero, Rita da Silva, Jonas Schöley, H. Maria Baden, Lionel Jouvét, Julia E. Fa, Hassan Syed, Eelke Jongejans, Shai Meiri, Jean-Michel Gaillard, Scott Chamberlain, Jonathan Wilcken, Owen R. Jones, Johan P. Dahlgren, Ulrich K. Steiner, Lucie M. Bland, Ivan Gomez-Mestre, Jean-Dominique Lebreton, Jaime González Vargas, Nate Flesness, Vladimir Canudas-Romo, Roberto Salguero-Gómez, Onnie Byers, Thomas Bjørneboe Berg, Alexander Scheuerlein, Sébastien Devillard, Dmitry S. Schigel, Oliver A. Ryder, Hugh P. Possingham, Annette Baudisch, and James W. Vaupel

### Index

#### SI Figures

|                                                                                |   |
|--------------------------------------------------------------------------------|---|
| Figure S1. The landscape of demographic knowledge for Reptiles.....            | 2 |
| Figure S2. The landscape of demographic knowledge for Mammals.....             | 3 |
| Figure S3. The landscape of demographic knowledge for Aves.....                | 4 |
| Figure S4. The landscape of demographic knowledge for Amphibia.....            | 5 |
| Figure S5. Origin of information across the 22 data repositories analyzed..... | 6 |

#### SI Tables

|                                                                                                                                                          |    |
|----------------------------------------------------------------------------------------------------------------------------------------------------------|----|
| Table S1. Number of species per Demographic Species Knowledge Index category according to the IUCN Red List .....                                        | 7  |
| Table S2. Number of species that have information on the eight demographic measures in the 22 databases (DB) analyzed. ....                              | 10 |
| Table S3. Number of species by taxonomic class indicating the origin (captive, wild or/and unknown) of the information reported in the 22 databases..... | 11 |

# Reptilia

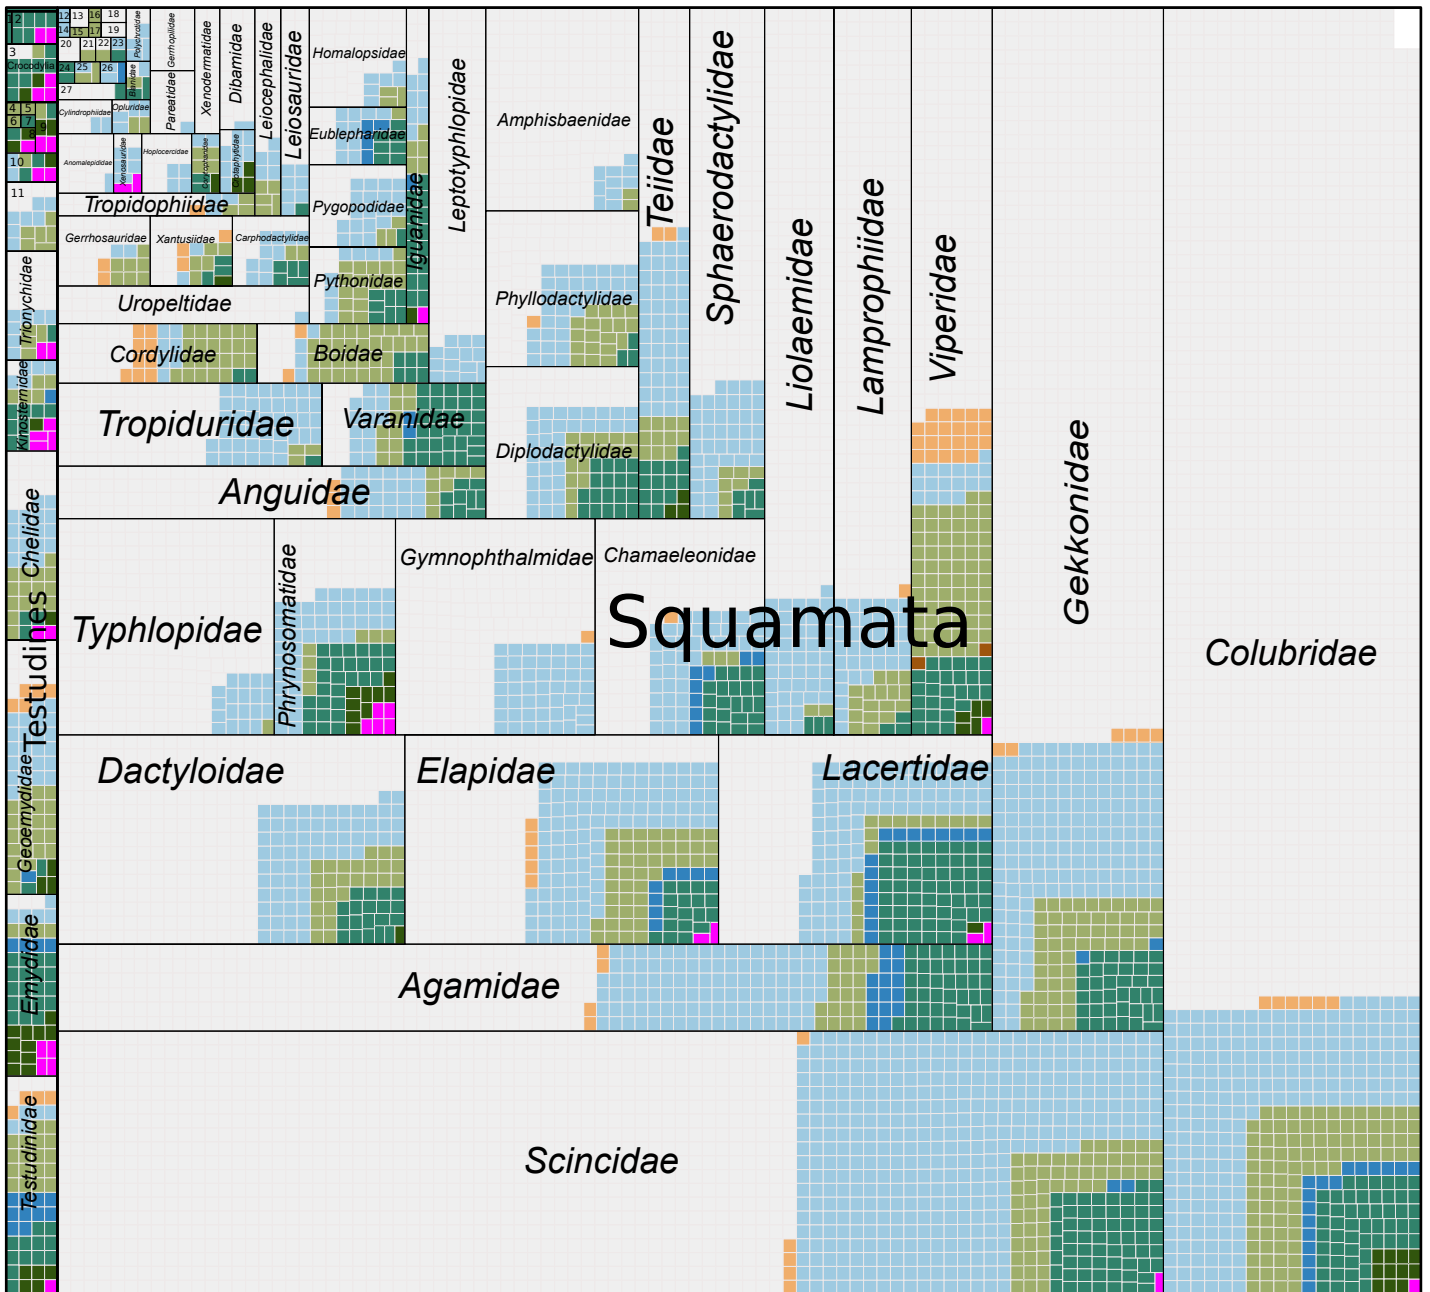

1: Gavialidae, 2: Alligatoridae, 3: Crocodylidae, 4: Carettochelyidae, 5: Platysternidae, 6: Dermatemydidae, 7: Dermatemydidae, 8: Chelydridae, 9: Cheloniidae, 10: Cheloniidae, 11: Pelomedusidae, 12: Aniliidae, 13: Cadeidae, 14: Rhineuridae, 15: Lanthanotidae, 16: Loxocemidae, 17: Shinisauridae, 18: Xenophidiidae, 19: Xenotyphlopidae, 20: Anomochillidae, 21: Bolyeridae, 22: Xenopeltidae, 23: Anniellidae, 24: Helodermatidae, 25: Acrochordidae, 26: Bipedidae, 27: Trogonophiidae

## Taxonomic Rank

Order \_\_\_\_\_

Family \_\_\_\_\_

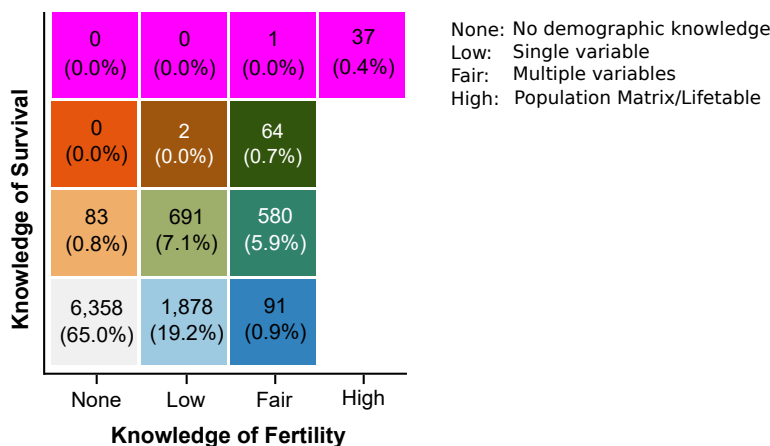

Figure S1. The landscape of demographic knowledge for Reptilia

# Mammalia

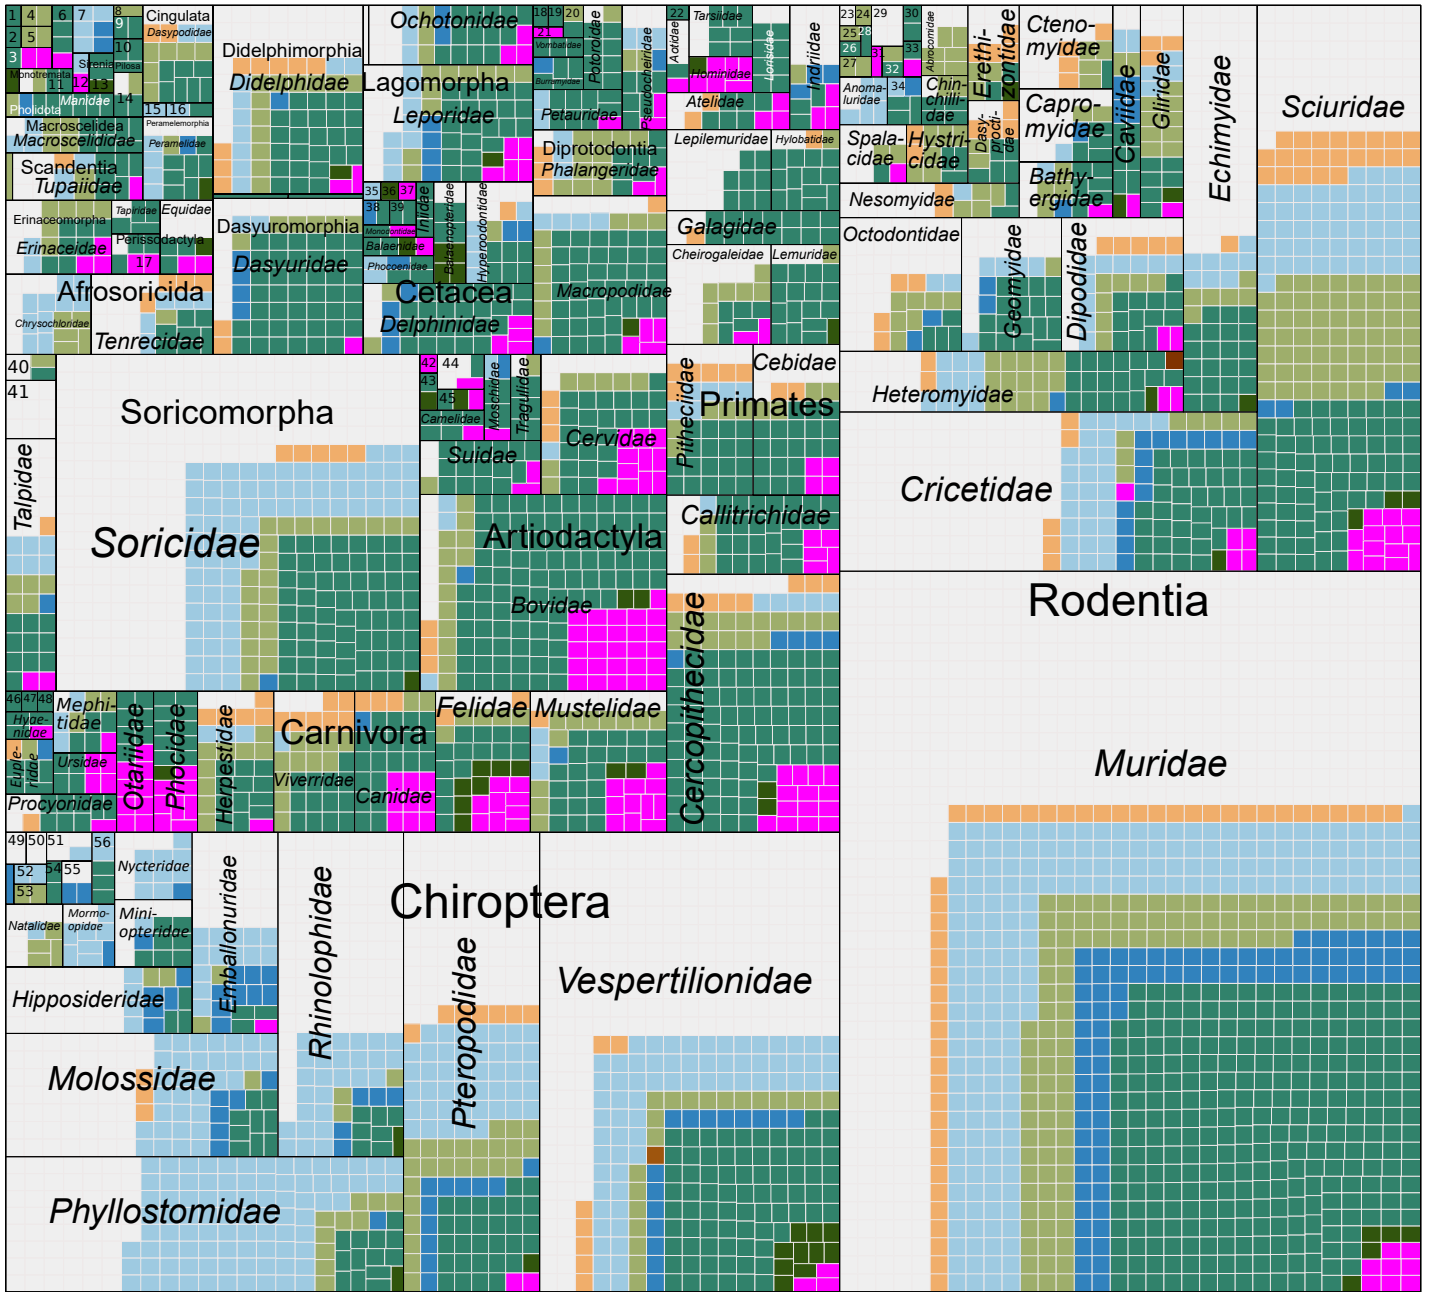

1: Microbiotheriidae, 2: Orycteropodidae, 3: Elephantine, 4: Cynocephalidae, 5: Notoryctidae, 6: Procaviidae, 7: Caenolestidae, 8: Cyclopedidae, 9: Megalonychidae, 10: Myrmecophagidae, 11: Tachyglossidae, 12: Dugongidae, 13: Trichechidae, 14: Bradypodidae, 15: Chaeropodidae, 16: Thylacomyidae, 17: Rhinocerotidae, 18: Hyppiprymodontidae, 19: Tarsipedidae, 20: Acrobatidae, 21: Phascolarctidae, 22: Daubentonidae, 23: Diatomidae, 24: Dinomyidae, 25: Petromuridae, 26: Aplodontiidae, 27: Calomyscidae, 28: Pedetidae, 29: Heptaxodontidae, 30: Cuniculidae, 31: Myocastoridae, 32: Thryonomidae, 33: Castoridae, 34: Ctenodactylidae, 35: Neobalaenidae, 36: Eschrichtidae, 37: Physteridae, 38: Kogiidae, 39: Platanistidae, 40: Solenodontidae, 41: Nesophontidae, 42: Antilocapridae, 43: Giraffidae, 44: Hippopotamidae, 45: Tayassuidae, 46: Ailuridae, 47: Nandiniidae, 48: Odobenidae, 49: Cistugidae, 50: Myzopodidae, 51: Thyropteridae, 52: Furipteridae, 53: Mystacinidae, 54: Noctilionidae, 55: Rhinomatidae, 56: Megadermatidae

## Taxonomic Rank

Order \_\_\_\_\_

Family \_\_\_\_\_

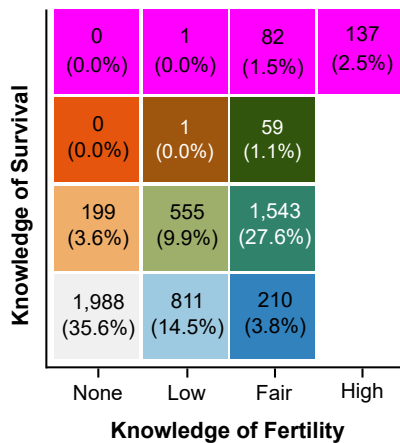

None: No demographic knowledge  
 Low: Single variable  
 Fair: Multiple variables  
 High: Population Matrix/Lifetable

Figure S2. The landscape of demographic knowledge for Mammalia

# Aves

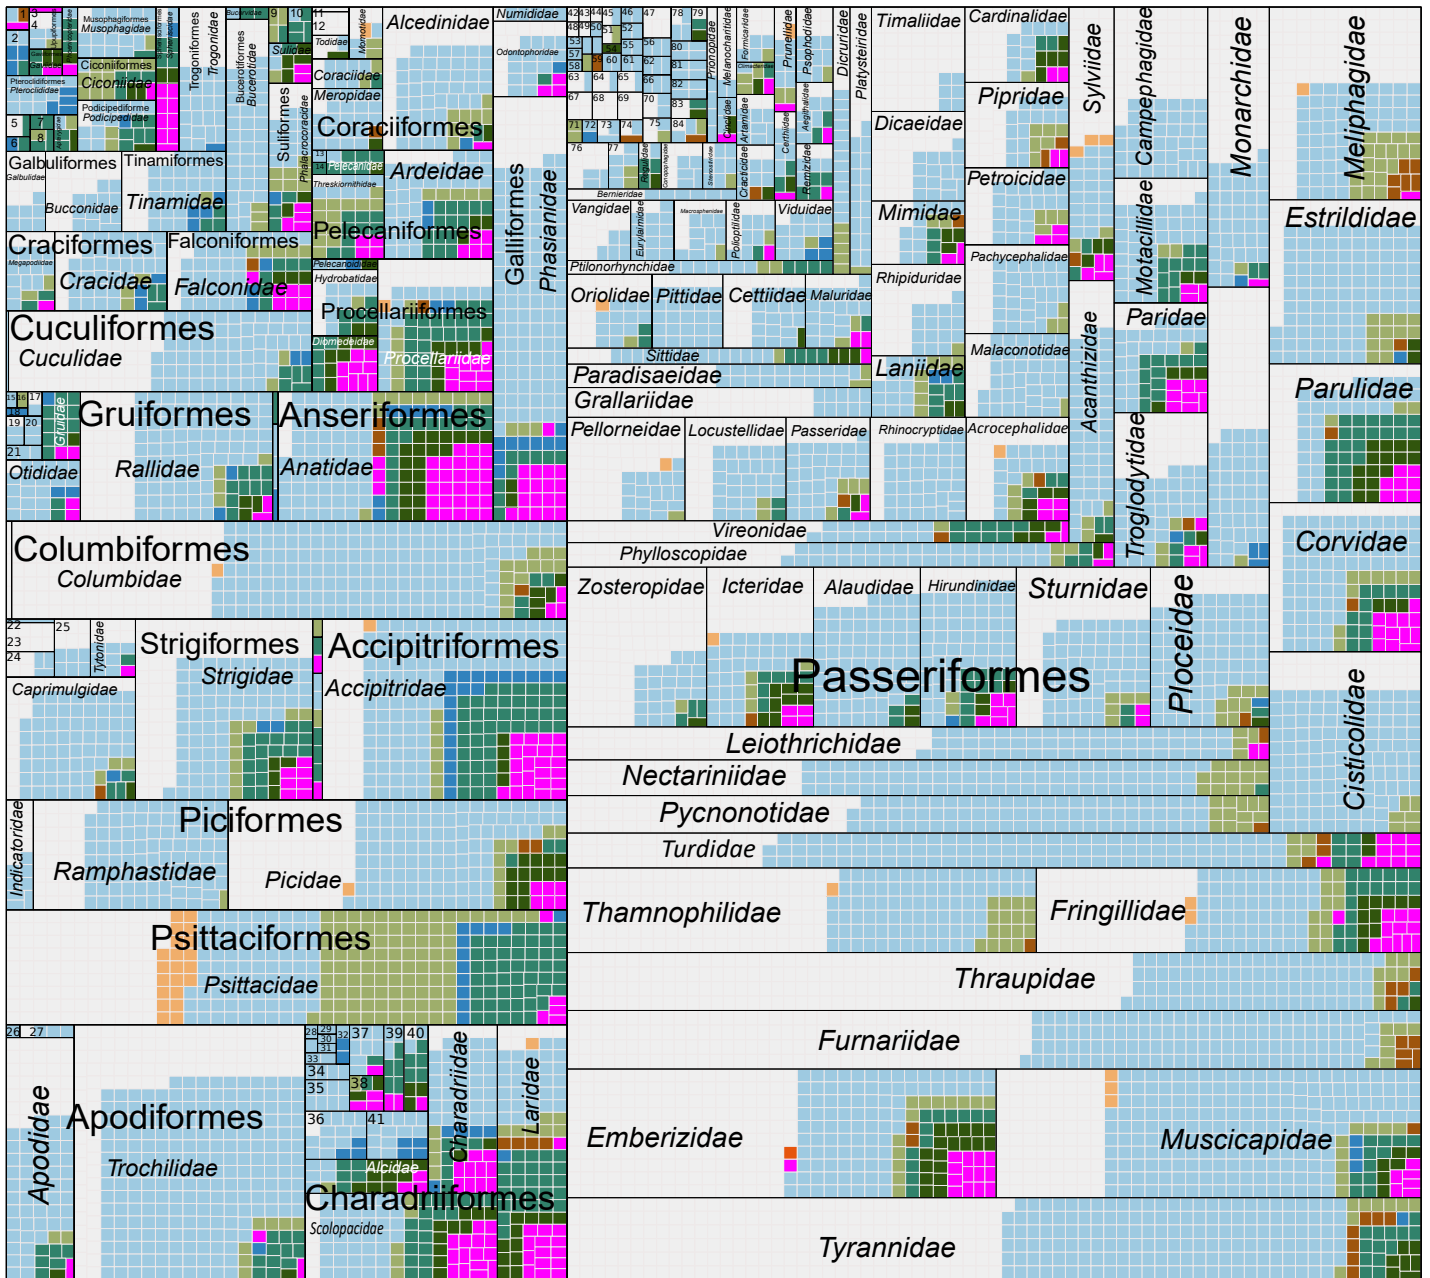

- 1: Phaethontidae, 2: Coliidae, 3: Upupidae, 4: Phoeniculidae, 5: Dromaiidae, 6: Rheidae, 7: Struthionidae, 8: Casuariidae, 9: Anhingidae, 10: Fregatidae, 11: Leptosomidae, 12: Brachypteraciidae, 13: Scopidae, 14: Balaenicipitidae, 15: Aramidae, 16: Eurypygidae, 17: Cariamidae, 18: Rhynochetidae, 19: Psophiidae, 20: Heliornithidae, 21: Mesitornithidae, 22: Steatornithidae, 23: Aegothelidae, 24: Nyctibiidae, 25: Podargidae, 26: Aegothelidae, 27: Hemiprocidae, 28: Dromadidae, 29: Pedionomidae, 30: Pluvianellidae, 31: Pluvianidae, 32: Rostratulidae, 33: Chionidae, 34: Thinocoridae, 35: Jacanidae, 36: Turnicidae, 37: Burhinidae, 38: Stercorariidae, 39: Recurvirostridae, 40: Haematopodidae, 41: Glareolidae, 42: Calcaridae, 43: Eupetidae, 44: Hylacitridae, 45: Paramythiidae, 46: Chaetopidae, 47: Mohoidae, 48: Pityriasiidae, 49: Sapayoiidae, 50: Donacobiidae, 51: Irenidae, 52: Machaerirhynchidae, 53: Dulidae, 54: Panuridae, 55: Menuridae, 56: Dasyornithidae, 57: Hypocoliidae, 58: Peucedramidae, 59: Coerebidae, 60: Buphagidae, 61: Picathartidae, 62: Nicatoridae, 63: Arcanatoridae, 64: Cnemophilidae, 65: Oreocidae, 66: Orthonychidae, 67: Melanopareiidae, 68: Philepittidae, 69: Pnoepygidae, 70: Neositidae, 71: Promeropidae, 72: Atrichornithidae, 73: Erythroceridae, 74: Callaeidae, 75: Acanthisittidae, 76: Chloropseidae, 77: Tephrodornithidae, 78: Hylotiidae, 79: Bombycridae, 80: Aegithinidae, 81: Pardalotidae, 82: Ptilonotidae, 83: Corcoraciidae, 84: Pomatostomidae

## Taxonomic Rank

Order \_\_\_\_\_

Family \_\_\_\_\_

|                       |                        |                  |               |               |
|-----------------------|------------------------|------------------|---------------|---------------|
| Knowledge of Survival | 1<br>(0.0%)            | 14<br>(0.1%)     | 80<br>(0.8%)  | 248<br>(2.4%) |
|                       | 1<br>(0.0%)            | 63<br>(0.6%)     | 258<br>(2.5%) |               |
|                       | 42<br>(0.4%)           | 528<br>(5.1%)    | 600<br>(5.8%) |               |
|                       | 3,637<br>(35.2%)       | 4,740<br>(45.9%) | 123<br>(1.2%) |               |
|                       | None                   | Low              | Fair          | High          |
|                       | Knowledge of Fertility |                  |               |               |

None: No demographic knowledge  
 Low: Single variable  
 Fair: Multiple variables  
 High: Population Matrix/Lifetable

Figure S3. The landscape of demographic knowledge for Aves

# Amphibia

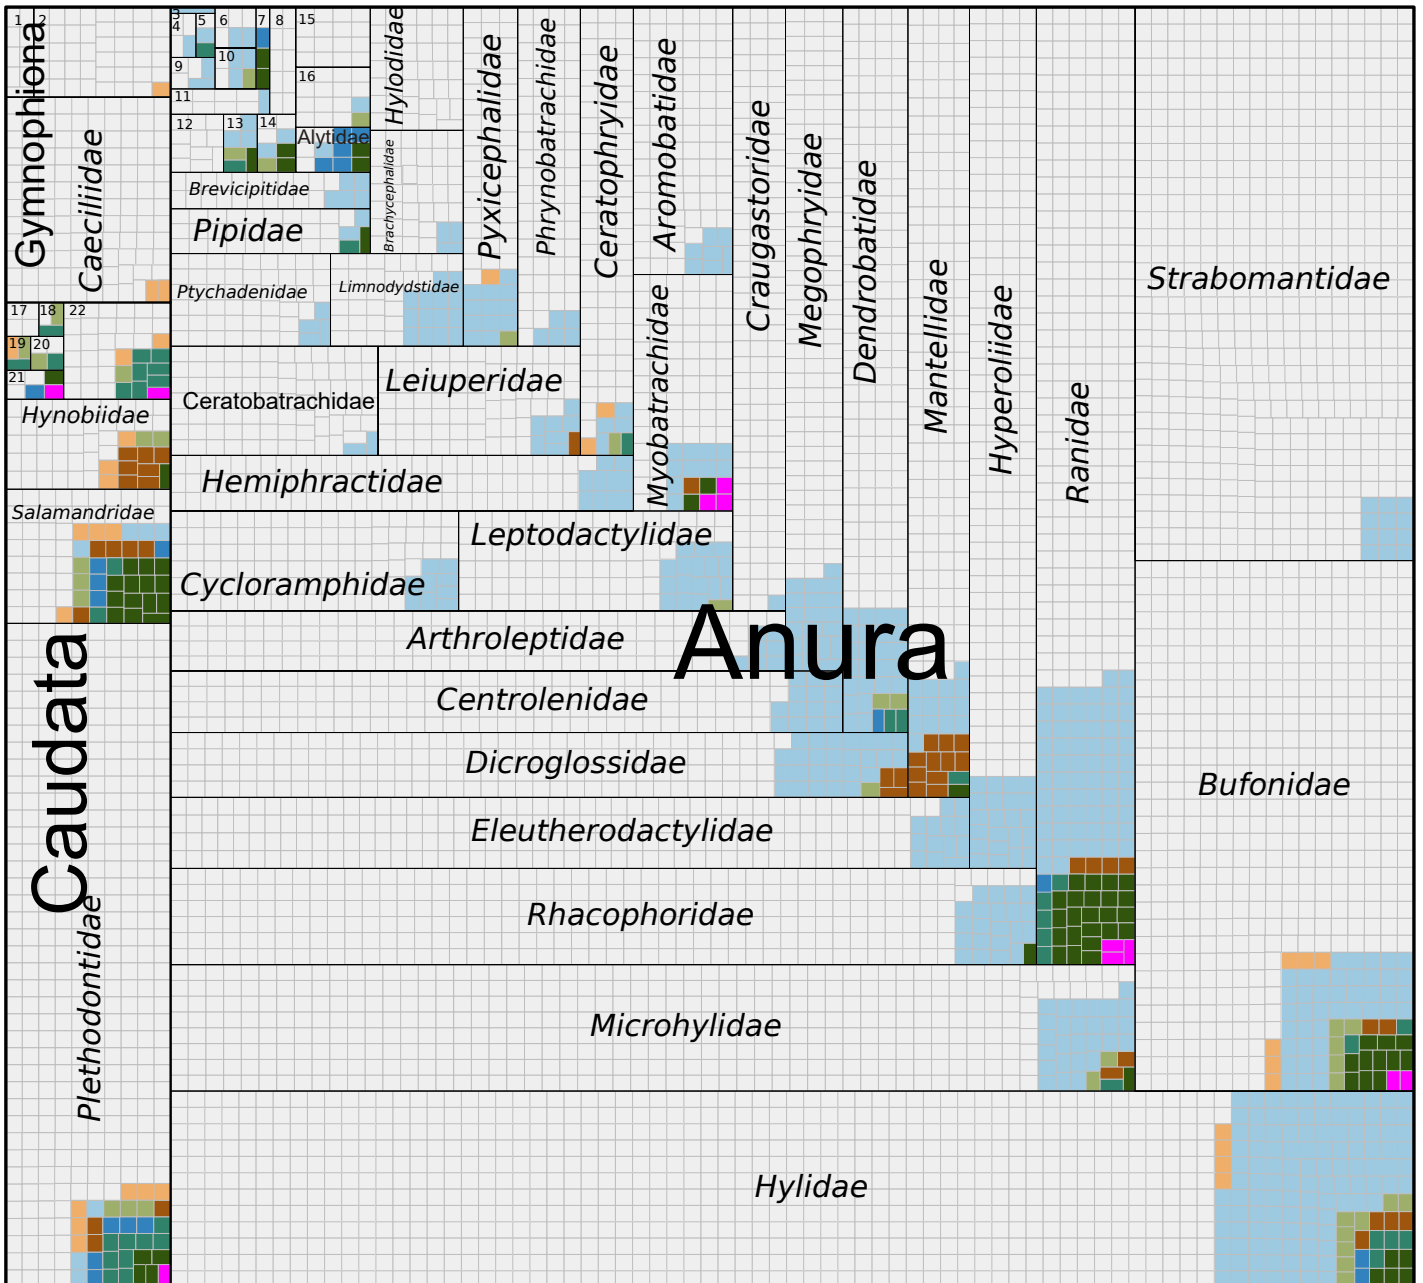

1: Rhinatrematidae, 2: Ichthyophiidae, 3: Rhinophrynidae, 4: Calyptocephalellidae, 5: Pelodytidae, 6: Heleophrynidae, 7: Pelobatidae, 8: Ranixalidae, 9: Sooglossidae, 10: Leiopelmatidae, 11: Hemisotidae, 12: Micrixalidae, 13: Scaphiopodidae, 14: Bombinatoridae, 15: Nyctibatrachidae, 16: Petropedetidae, 17: Rhyacotritonidae, 18: Amphiumidae, 19: Cryptobranchidae, 20: Sirenidae, 21: Proteidae, 22: Ambystomatidae

## Taxonomic Rank

Order \_\_\_\_\_

Family \_\_\_\_\_

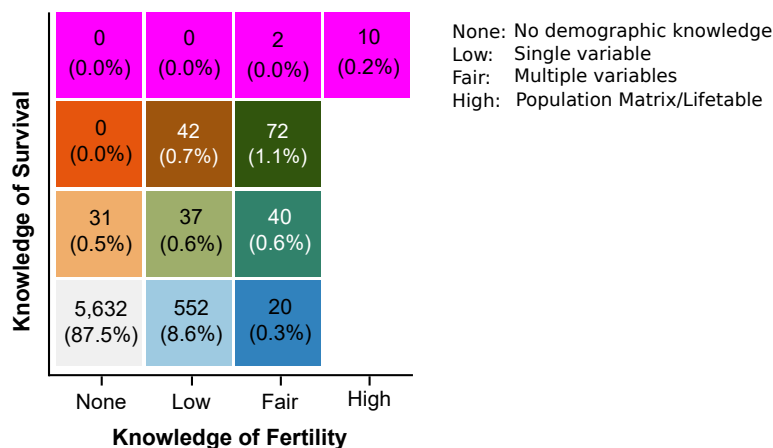

Figure S4. The landscape of demographic knowledge for Amphibia

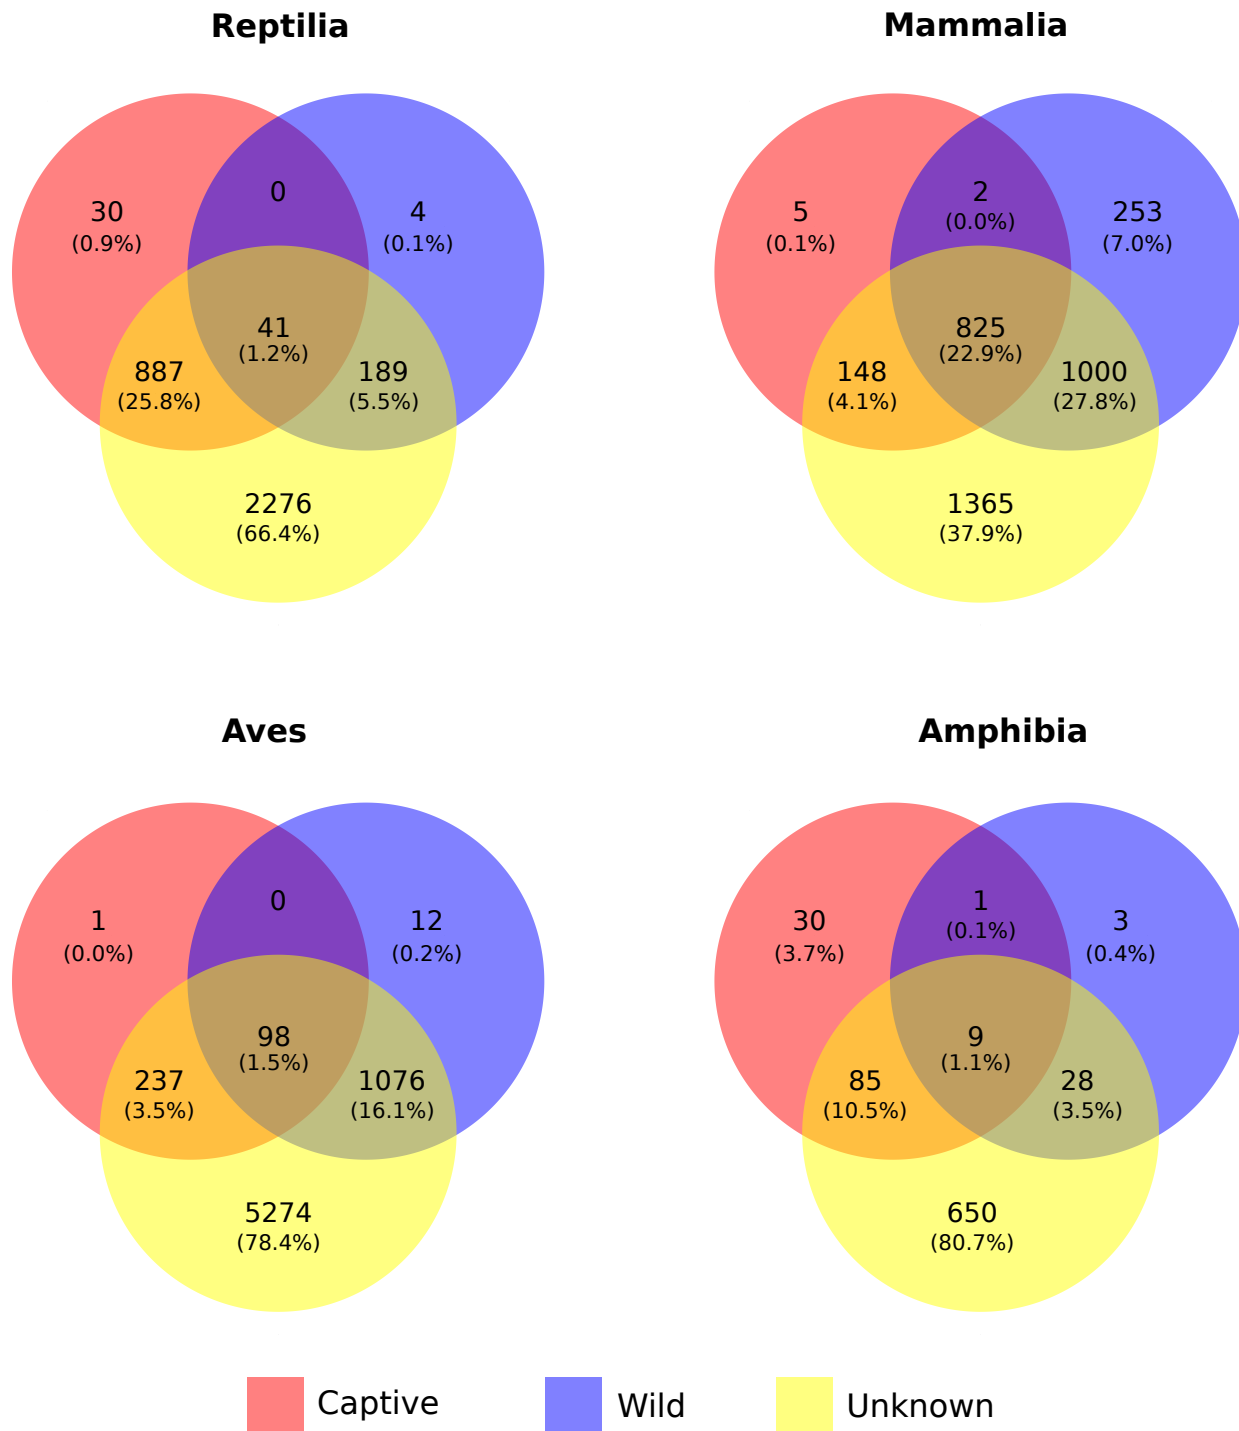

**Figure S5. Origin of information across the 22 data repositories analyzed.** Diagrams show all possible combinations of the number of species with data from populations with different origins (captive (left), wild (right), and unknown (bottom)).

**Table S1.** Number of species per Demographic Species Knowledge Index category and IUCN Red List categories (LC: least concern, NT: near threatened, VU: vulnerable, EN: endangered, CR: critically endangered, EW: extinct in the wild, DD: data deficient, and NE: not evaluated).

**Reptilia**

| Demographic Species Knowledge Index |           | LC          | NT         | VU         | EN         | CR         | EW       | EX        | DD         | NE          | Total       |
|-------------------------------------|-----------|-------------|------------|------------|------------|------------|----------|-----------|------------|-------------|-------------|
| Mortality                           | Fertility |             |            |            |            |            |          |           |            |             |             |
| None                                | None      | 2090        | 228        | 264        | 316        | 173        | 2        | 15        | 864        | 2406        | 6358        |
| None                                | Low       | 951         | 54         | 77         | 80         | 27         | 1        | 0         | 68         | 620         | 1878        |
| None                                | Fair      | 49          | 8          | 5          | 9          | 6          | 0        | 0         | 0          | 14          | 91          |
| Low                                 | None      | 27          | 0          | 7          | 3          | 5          | 0        | 0         | 3          | 38          | 83          |
| Low                                 | Low       | 297         | 29         | 33         | 34         | 15         | 0        | 1         | 11         | 271         | 691         |
| Low                                 | Fair      | 325         | 33         | 43         | 17         | 21         | 0        | 1         | 4          | 136         | 580         |
| Fair                                | None      | 0           | 0          | 0          | 0          | 0          | 0        | 0         | 0          | 0           | 0           |
| Fair                                | Low       | 1           | 0          | 0          | 0          | 0          | 0        | 0         | 0          | 1           | 2           |
| Fair                                | Fair      | 30          | 2          | 9          | 3          | 3          | 0        | 0         | 0          | 17          | 64          |
| High                                | None      | 0           | 0          | 0          | 0          | 0          | 0        | 0         | 0          | 0           | 0           |
| High                                | Low       | 0           | 0          | 0          | 0          | 0          | 0        | 0         | 0          | 0           | 0           |
| High                                | Fair      | 1           | 0          | 0          | 0          | 0          | 0        | 0         | 0          | 0           | 1           |
| High                                | High      | 20          | 3          | 6          | 3          | 1          | 0        | 0         | 0          | 4           | 37          |
| <b>Total</b>                        |           | <b>3791</b> | <b>357</b> | <b>444</b> | <b>465</b> | <b>251</b> | <b>3</b> | <b>17</b> | <b>950</b> | <b>3507</b> | <b>9785</b> |

**Aves**

| Demographic Species Knowledge Index |           | LC          | NT         | VU         | EN         | CR         | EW       | EX        | DD        | NE          | Total        |
|-------------------------------------|-----------|-------------|------------|------------|------------|------------|----------|-----------|-----------|-------------|--------------|
| Mortality                           | Fertility |             |            |            |            |            |          |           |           |             |              |
| None                                | None      | 2007        | 380        | 315        | 172        | 91         | 2        | 63        | 32        | 575         | 3637         |
| None                                | Low       | 3451        | 270        | 201        | 117        | 54         | 1        | 8         | 8         | 630         | 4740         |
| None                                | Fair      | 86          | 8          | 9          | 6          | 3          | 0        | 0         | 0         | 11          | 123          |
| Low                                 | None      | 22          | 6          | 5          | 2          | 2          | 0        | 0         | 0         | 5           | 42           |
| Low                                 | Low       | 382         | 34         | 28         | 23         | 8          | 0        | 2         | 0         | 51          | 528          |
| Low                                 | Fair      | 372         | 38         | 48         | 26         | 6          | 1        | 7         | 0         | 102         | 600          |
| Fair                                | None      | 0           | 0          | 0          | 0          | 0          | 0        | 0         | 0         | 1           | 1            |
| Fair                                | Low       | 48          | 3          | 2          | 0          | 1          | 0        | 0         | 0         | 9           | 63           |
| Fair                                | Fair      | 187         | 16         | 9          | 10         | 4          | 0        | 0         | 0         | 32          | 258          |
| High                                | None      | 1           | 0          | 0          | 0          | 0          | 0        | 0         | 0         | 0           | 1            |
| High                                | Low       | 9           | 0          | 2          | 0          | 0          | 0        | 0         | 0         | 3           | 14           |
| High                                | Fair      | 59          | 3          | 6          | 3          | 0          | 0        | 0         | 0         | 9           | 80           |
| High                                | High      | 174         | 21         | 14         | 9          | 7          | 0        | 0         | 0         | 23          | 248          |
| <b>Total</b>                        |           | <b>6798</b> | <b>779</b> | <b>639</b> | <b>368</b> | <b>176</b> | <b>4</b> | <b>80</b> | <b>40</b> | <b>1451</b> | <b>10335</b> |

c) **Mammalia**

| Demographic Species Knowledge Index |           | LC   | NT  | VU  | EN  | CR  | EW | EX | DD  | NE  | Total |
|-------------------------------------|-----------|------|-----|-----|-----|-----|----|----|-----|-----|-------|
| Mortality                           | Fertility |      |     |     |     |     |    |    |     |     |       |
| None                                | None      | 754  | 93  | 160 | 177 | 73  | 0  | 43 | 393 | 295 | 1988  |
| None                                | Low       | 514  | 44  | 57  | 35  | 12  | 0  | 5  | 63  | 81  | 811   |
| None                                | Fair      | 128  | 14  | 9   | 20  | 5   | 0  | 1  | 9   | 24  | 210   |
| Low                                 | None      | 100  | 12  | 23  | 12  | 5   | 0  | 2  | 23  | 22  | 199   |
| Low                                 | Low       | 329  | 36  | 55  | 31  | 12  | 0  | 5  | 40  | 47  | 555   |
| Low                                 | Fair      | 872  | 92  | 144 | 134 | 54  | 2  | 6  | 71  | 168 | 1543  |
| Fair                                | None      | 0    | 0   | 0   | 0   | 0   | 0  | 0  | 0   | 0   | 0     |
| Fair                                | Low       | 0    | 1   | 0   | 0   | 0   | 0  | 0  | 0   | 0   | 1     |
| Fair                                | Fair      | 34   | 5   | 8   | 6   | 0   | 0  | 0  | 0   | 6   | 59    |
| High                                | None      | 0    | 0   | 0   | 0   | 0   | 0  | 0  | 0   | 0   | 0     |
| High                                | Low       | 0    | 0   | 0   | 1   | 0   | 0  | 0  | 0   | 0   | 1     |
| High                                | Fair      | 60   | 5   | 5   | 4   | 3   | 0  | 0  | 0   | 5   | 82    |
| High                                | High      | 81   | 9   | 18  | 11  | 5   | 0  | 0  | 1   | 12  | 137   |
| <b>Total</b>                        |           | 2872 | 311 | 479 | 431 | 169 | 2  | 62 | 600 | 660 | 5586  |

d) **Amphibia**

| Demographic Species Knowledge Index |           | LC   | NT  | VU  | EN  | CR  | EW | EX | DD   | NE  | Total |
|-------------------------------------|-----------|------|-----|-----|-----|-----|----|----|------|-----|-------|
| Mortality                           | Fertility |      |     |     |     |     |    |    |      |     |       |
| None                                | None      | 1758 | 276 | 481 | 666 | 434 | 1  | 11 | 1195 | 810 | 5632  |
| None                                | Low       | 390  | 26  | 28  | 46  | 14  | 0  | 1  | 7    | 40  | 552   |
| None                                | Fair      | 11   | 3   | 3   | 2   | 0   | 0  | 0  | 0    | 1   | 20    |
| Low                                 | None      | 20   | 2   | 4   | 2   | 1   | 1  | 0  | 0    | 1   | 31    |
| Low                                 | Low       | 23   | 6   | 1   | 1   | 2   | 0  | 0  | 0    | 4   | 37    |
| Low                                 | Fair      | 32   | 3   | 0   | 2   | 1   | 0  | 0  | 0    | 2   | 40    |
| Fair                                | None      | 0    | 0   | 0   | 0   | 0   | 0  | 0  | 0    | 0   | 0     |
| Fair                                | Low       | 20   | 4   | 7   | 7   | 1   | 0  | 0  | 2    | 1   | 42    |
| Fair                                | Fair      | 54   | 8   | 5   | 1   | 1   | 0  | 0  | 0    | 3   | 72    |
| High                                | None      | 0    | 0   | 0   | 0   | 0   | 0  | 0  | 0    | 0   | 0     |
| High                                | Low       | 0    | 0   | 0   | 0   | 0   | 0  | 0  | 0    | 0   | 0     |
| High                                | Fair      | 1    | 0   | 1   | 0   | 0   | 0  | 0  | 0    | 0   | 2     |
| High                                | High      | 6    | 1   | 1   | 0   | 2   | 0  | 0  | 0    | 0   | 10    |
| <b>Total</b>                        |           | 2315 | 329 | 531 | 727 | 456 | 2  | 12 | 1204 | 862 | 6438  |

See main manuscript methods section on measures of demographic knowledge for further information about the Demographic Species Knowledge Index (D-SKI).



**Table S2.** Number of species that have information on the eight demographic measures in the 22 databases (DB) analyzed. In parenthesis we show the number of species that are in the Species360's zoo and aquarium network that can help to close the knowledge gap for each demographic measure. For the threatened categories we included CR, VU, EN, and EW; in the non-threatened categories we included the LC, NT, and DD species from the IUCN Red List.

| Demographic measure                | Reptilia     |                  |                           | Mammalia     |                  |                           | Aves         |                  |                           | Amphibia     |                  |                           |
|------------------------------------|--------------|------------------|---------------------------|--------------|------------------|---------------------------|--------------|------------------|---------------------------|--------------|------------------|---------------------------|
|                                    | # Threatened | # Non-threatened | % of species in the 22 DB | # Threatened | # Non-threatened | % of species in the 22 DB | # Threatened | # Non-threatened | % of species in the 22 DB | # Threatened | # Non-threatened | % of species in the 22 DB |
| <b>Fertility</b>                   |              |                  |                           |              |                  |                           |              |                  |                           |              |                  |                           |
| Age at first reproduction          | 123 (121)    | 634 (546)        | 7.7 (6.8)                 | 426 (44)     | 1545 (165)       | 35.7 (3.8)                | 155 (171)    | 1117 (1502)      | 12.4 (16.3)               | 35 (80)      | 164 (231)        | 3.1 (4.8)                 |
| Inter-litter/Inter-birth interval  | 12 (185)     | 50 (820)         | 0.6 (10.3)                | 283 (94)     | 878 (317)        | 21.0 (7.4)                | 20 (236)     | 55 (2092)        | 0.7 (22.7)                | 1 (91)       | 1 (323)          | 0 (6.4)                   |
| Litter/Clutch size                 | 392 (38)     | 2946 (129)       | 34.2 (1.7)                | 616 (24)     | 2731 (35)        | 60.6 (1.1)                | 597 (33)     | 6038 (237)       | 64.7 (2.6)                | 105 (71)     | 605 (149)        | 11.0 (3.4)                |
| Proportion of reproductive females | 0 (193)      | 0 (849)          | 0 (10.7)                  | 0 (248)      | 0 (734)          | 0 (17.8)                  | 6 (240)      | 38 (2103)        | 0.4 (22.8)                | 0 (91)       | 0 (324)          | 0 (6.5)                   |
| Recruitment                        | 0 (193)      | 0 (849)          | 0 (10.7)                  | 0 (248)      | 0 (734)          | 0 (17.8)                  | 3 (242)      | 19 (2116)        | 0.2 (23.0)                | 0 (91)       | 0 (324)          | 0 (6.5)                   |
| <b>Mortality/Survival</b>          |              |                  |                           |              |                  |                           |              |                  |                           |              |                  |                           |
| Maximum recorded lifespan          | 199 (84)     | 1229 (303)       | 14.6 (4.0)                | 531 (11)     | 2028 (31)        | 46.3 (0.8)                | 194 (141)    | 1438 (1306)      | 15.9 (14.1)               | 39 (73)      | 187 (208)        | 3.5 (4.4)                 |
| Mean age of (adult) population     | 0 (193)      | 0 (849)          | 0 (10.7)                  | 0 (248)      | 0 (734)          | 0 (17.8)                  | 0 (243)      | 0 (2126)         | 0 (23.1)                  | 22 (85)      | 92 (273)         | 1.8 (5.6)                 |
| Crude mortality                    | 22 (177)     | 81 (800)         | 1.1 (10.0)                | 49 (213)     | 187 (595)        | 4.3 (14.6)                | 72 (217)     | 736 (1725)       | 7.9 (18.9)                | 2 (91)       | 20 (305)         | 0.3 (6.2)                 |

**Table S3.** Number of species by taxonomic class indicating the origin (captive, wild or/and unknown) of the information reported in the 22 databases (as shown in SI Appendix, Fig. S5). A single species may have data from populations of different origins.

| Demographic measure                    | Origin/Number of Species |         |         |          |         |         |
|----------------------------------------|--------------------------|---------|---------|----------|---------|---------|
|                                        | Reptilia                 |         |         | Mammalia |         |         |
| Fertility                              | Wild                     | Captive | Unknown | Wild     | Captive | Unknown |
| Age at first reproduction              | 18                       | 1       | 758     | 808      | 42      | 1910    |
| Inter-litter/Inter-birth interval      | -                        | -       | 62      | 402      | 10      | 1117    |
| Litter/Clutch size                     | -                        | -       | 3340    | 1970     | 31      | 3038    |
| Proportion of reproductive females     | -                        | -       | -       | -        | -       | -       |
| Recruitment                            | -                        | -       | -       | -        | -       | -       |
| Age- or stage-specific fertility rates | 32                       | 1       | 6       | 131      | 6       | 6       |
| <b>Mortality/Survival</b>              |                          |         |         |          |         |         |
| Maximum recorded lifespan              | 176                      | 957     | 896     | 399      | 953     | 2536    |
| Mean age of (adult) population         | -                        | -       | -       | -        | -       | -       |
| Crude mortality                        | 55                       | -       | 72      | 190      | 12      | 105     |
| Age- or stage-specific death rates     | 33                       | 1       | 6       | 205      | 31      | 9       |
| Demographic measure                    | Aves                     |         |         | Amphibia |         |         |
|                                        | Wild                     | Captive | Unknown | Wild     | Captive | Unknown |
| Age at first reproduction              | 396                      | -       | 1247    | -        | -       | 199     |
| Inter-litter/Inter-birth interval      | -                        | -       | 75      | -        | -       | 2       |
| Litter/Clutch size                     | 443                      | -       | 6646    | -        | -       | 711     |
| Proportion of reproductive females     | 44                       | -       | -       | -        | -       | -       |
| Recruitment                            | 22                       | -       | -       | -        | -       | -       |
| Age- or stage-specific fertility rates | 243                      | 7       | 10      | 10       | 0       | 0       |
| <b>Mortality/Survival</b>              |                          |         |         |          |         |         |
| Maximum recorded lifespan              | 882                      | 325     | 1586    | 26       | 123     | 110     |
| Mean age of (adult) population         | -                        | -       | -       | -        | -       | 114     |
| Recruitment                            | 804                      | -       | 31      | 6        | 1       | 21      |
| Age- or stage-specific death rates     | 331                      | 15      | 11      | 11       | 1       | 0       |
